# Supplementary material for: Metabolic Implications of COVID-19: Exploring Lipids and Inflammation
Source: Research Square preprint supplement (doi:10.21203/rs.3.rs-6613080/v1), 2025-08-11
Supplement: Supplementary file 1 [file 2d72d5136cf6700b453926be.docx]

**Supplementary Appendix**

|  | COVID-19 Outcomes | | | | | | | | |
| --- | --- | --- | --- | --- | --- | --- | --- | --- | --- |
| **Variables** | Mortality | | | ICU / High Care | | | Respiratory support | | |
| **OR** | **95% CI** | **p-value** | **OR** | **95% CI** | **p-value** | **OR** | **95% CI** | **p-value** |
| **Inflammatory markers** |  |  |  |  |  |  |  |  |  |
| **Th17:** Interleukin-6 | 3.86 | 1.61, 9.25 | **0.002** | 1.35 | 0.85, 2.15 | 0.21 | 1.45 | 0.88, 2.38 | 0.14 |
| Interleukin-17 | 0.94 | 0.71, 1.26 | **0.69** | 1.48 | 1.13, 1.92 | 0.004 | 0.98 | 0.70, 1.35 | 0.89 |
| Interleukin-1β | 1.74 | 0.99, 3.04 | **0.05** | 1.69 | 1.00, 2.88 | **0.04** | 1.69 | 0.95, 3.02 | **0.07** |
| **Th1:** Interleukin-2 | 1.67 | 1.01, 2.75 | **0.04** | 1.66 | 0.94, 2.93 | 0.08 | 1.47 | 0.84, 2.58 | 0.18 |
| Interleukin-12 | 1.48 | 0.92, 2.40 | **0.11** | 1.25 | 0.73, 2.13 | 0.42 | 1.48 | 0.88, 2.49 | 0.14 |
| Interferon-γ | 1.91 | 1.14, 3.21 | **0.01** | 1.32 | 0.77, 2.26 | 0.31 | 1.34 | 0.78, 2.29 | **0.29** |
| Tumour necrosis factor α | 1.05 | 0.98, 1.13 | 0.18 | 0.92 | 0.82, 1.04 | 0.18 | 0.96 | 0.86, 1.45 | **0.26** |
| **Th2:** Interleukin-10 | 1.76 | 0.99, 3.14 | **0.05** | 1.26 | 0.77, 0.21 | 0.35 | 1.45 | 0.85, 2.49 | **0.18** |
| Interleukin-13 | 1.21 | 0.74, 2.00 | 0.45 | 1.29 | 0.84, 2.02 | 0.67 | 1.45 | 0.72, 2.92 | **0.29** |
| **Table 1.** Multivariate logistic regression analysis for outcome measures in COVID-19 categorised according to the Th1, Th2, and Th17 inflammatory response (adjusted for age, sex and race). *OR* Odds ratio, *CI* confidence interval. Association of a 1SD increase in variables with hospital outcomes in patients admitted with severe COVID-19. Statistical significance *P* ≤0.05, shown in bold. | | | | | | | | | |

| **Lipid Profile** | **NLR** † | **CRP**† | **Ferritin**† | **LDH**† | **IL-6**† | **IL-2**† | **IFN-γ** | **TNF-α**† | **IL10**† |
| --- | --- | --- | --- | --- | --- | --- | --- | --- | --- |
| TC | -0.01  (-0.26, 0.23) | -0.35  (-0.55, -0.11) | 0.05  (-0.19, 0.29) | -0.17  (-0.37, 0.05) | -0.32  (-0.51, -0.10) | -0.02  (-0.25, 0.21) | -0.11  (-0.32, 0.12) | -0.34  (-0.52, -0.12) | -0.22  (-042, 0.01**)** |
| p = 0.92 | **p = 0.004** | p = 0.69 | p = 0.12 | **p = 0.004** | p = 0.86 | p=0.37 | **p = 0.003** | p = 0.06 |
| LDL-C | -0.15  (-0.38, 0.09) | -0.42  (-0.60, -0.19) | -0.11  (-0.34, 0.14) | -0.22  (-0.42, -0.01 | **-**0.35  (-0.54, -0.14) | -0.03  (-0.26, 0.19) | -0.09  (-0.31, 0.14) | -0.44  (-0.60, -0.23) | -0.23  (-0.44, -0.01) |
| p = 0.23 | **p = 0.0005** | p = 0.39 | **p = 0.04** | **p = 0.001** | p = 0.76 | p=0.44 | **p < 0.0001** | **p = 0.04** |
| HDL-C | 0.07  (-0.18, 0.31) | 0.07  (-0.17, 0.31) | 0.03  (-0.22, 0.27) | 0.14  (-0.09, 0.36) | -0.11  (-0.33,0.11) | 0.08  (-0.15, 0.30) | -0.11  (-0.33, 0.12) | -0.15  (-0.37, 0.08) | -0.08  (-0.30, 0.15) |
| p = 0.59 | p = 0.56 | p = 0.84 | p = 0.83 | p = 0.32 | p = 0.47 | p=0.33 | p = 0.19 | p = 0.47 |
| TG† | 0.12  (-013, 0.35) | -0.09  (-033., 0.16) | 0.26  (0.01, 0.48) | -0.01  (-0.23, 0.20) | -0.07  (-0.29, 0.16) | -0.02  (-0.25, 0.20) | -0.09  (-0.31, 0.14) | 0.17  (-0.06, 0.38) | -0.03  (-0.25, 0.19) |
| p = 0.36 | p = 0.48 | **p = 0.03** | p = 0.92 | p = 0.53 | p = 0.84 | p=0.47 | p = 0.14 | p = 0.80 |
| TG:HDL-C † | 0.07  (-0.18, 0.31) | -0.05  (-0.29, 0.20) | 0.21  (-0.03, 0.44) | 0.01  (-0.20, 0.22) | 0.08  (-0.15, 0.30) | -0.05  (-0.27,-0.18) | -0.02  (-0.21, 0.25) | 0.24  (0.01, 0.44) | 0.04  (-0.19, 0.26) |
| p = 0.57 | p = 0.72 | p = 0.09 | p = 0.89 | p = 0.50 | p = 0.68 | p=0.86 | **p = 0.03** | p = 0.76 |
| Lp(a) † | -0.06  (-0.19, 0.29) | -0.04  (-0.28, 0.21) | -0.13  (-0.37, 0.12) | 0.04  (-0.17, 0.26) | -0.10  (-0.32, 0.13) | -0.12  (-0.34, 0.11) | -0.19  (-0.41, 0.03) | -0.07  (-0.29, 0.16) | **-**0.19  (-0.41, 0.03) |
| p = 0.65 | p = 0.75 | p = 0.29 | p = 0.69 | p = 0.37 | p = 0.31 | p=0.08 | p = 0.54 | p = 0.08 |
| **Table 2.** Correlations of lipid profiles with inflammatory markers on admission, adjusted for age, sex and race. †Logarithmically transformed, Statistical significance P≤0.05. CRP, c-reactive protein; eGFR, estimated glomerular filtration rate; HDL-C, high density lipoprotein cholesterol; IL-6, interleukin-6; IL-2, interleukin-2; IL-10, interleukin 10; LDH, lactate dehydrogenase; LDL-C, low density lipoprotein cholesterol; Lp(a), lipoprotein(a); NLR, neutrophil: lymphocyte ratio; PCT, procalcitonin; TC, total cholesterol; TG, triglyceride; TG:HDL, triglyceride: high density lipoprotein cholesterol ratio; TNF-α, tumour necrosis factor alpha. | | | | | | | | | |

|  | Baseline  n = 44 | Follow up  n = 44 | % change | p-value |
| --- | --- | --- | --- | --- |
| **Clinical parameters** |  | | | |
| Body mass index (kg/m2) | 32.8 ± 8.2 | 33.7 ± 8.1 | 2.3 | 0.62 |
| Systolic BP (mm Hg) | 123 ± 23 | 148 ± 23 | 15.9 | **<0.0001** |
| Diastolic BP (mm Hg) | 72 ± 16 | 88 ±1 4 | 16.8 | **<0.0001** |
| **Glycaemic parameters** |  | | | |
| Fasting glucose (mmol/L) | 7.9 (6.4-13.3) | 6.5 (5.5-8.1) | -42.0 | **0.004** |
| HbA1c (%) | 7.1 (6.5-8.2) | 6.2 (5.6-7.2) | -20.3 | **0.0009** |
| **Lipid parameters** |  |  |  |  |
| Total cholesterol(mmol/L) | 3.9 ± 0.9 | 4.6 ± 1.1 | 11.2 | **0.003** |
| Low density lipoprotein cholesterol (mmol/L) | 1.9 ± 0.8 | 2.8 ± 1.1 | 23.3 | **0.0002** |
| High density lipoprotein cholesterol (mmol/L) | 0.9 ± 0.3 | 1.3 ± 0.4 | 26.5 | **<0.0001** |
| Triglycerides (mmol/L) | 2.1 (1.3-2.4) | 1.3 (0.9-1.7) | -57.7 | **0.0003** |
| TG:HDL-c (mmol/L) | 2.2 (1.4-3.1) | 1.1 (0.6-1.4) | -164.1 | **<0.0001** |
| Lp(a) (mg/dl) | 41.1 (18-65.2) | 57.3 (14.6-85.9) | 14.8 | 0.11 |
| **Inflammatory markers** |  |  |  |  |
| Neutrophil : lymphocyte ratio (x 109/L) | 6.7 (3.6-10.4) | 1.7 (1.2-2.3) | -514.1 | **<0.0001** |
| C-reactive protein (mg/L) | 79.5 (45-125.5 | 9 (9-11) | -826.5 | **<0.0001** |
| D-dimer (mg/L) | 0.74 (0.47-1.36) | 0.23 (0.22-0.28) | -686.9 | **<0.0001** |
| Ferritin (ug/L) | 520 (322-959) | 65 (42-182.5) | -758.5 | **<0.0001** |
| Troponin (ng/L) | 7 (5-19) | 5 (3-7.5) | -133.8 | **0.02** |
| Lactate dehydrogenase (U/L) | 456 (378-561) | 247 (203-273) | -117.7 | **<0.0001** |
| Interleukin-6 (pg/ml) | 25.7 (7.7-71.9) | 6.14 (3.82-12.28) | -1348.4 | **<0.0001** |
| Interleukin-1β (pg/ml) | 1.41 (1.03-2.98) | 1.30 (0.82-2.16) | -298.4 | 0.23 |
| Interleukin-17 (pg/ml) | 12.15 (6.22-17.98) | 7.71 (2.84-12.82) | -2254.2 | **0.03** |
| Interferon-γ (pg/ml) | 18.45 (13.25-29.51) | 14.79 (9.89-25.47) | -49.4 | 0.13 |
| Interleukin-2 (pg/ml) | 2.62 (1.84-3.82) | 1.99 (1.13-2.94) | -152.9 | **0.02** |
| Interleukin-12 (pg/ml) | 4.19 (2.64-6.18) | 3.26 (1.83-5.45) | -56.9 | 0.14 |
| Interleukin-10 (pg/ml) | 27.71 (15.41-66.96) | 15.89 (4.32-31.39) | -486.2 | **0.003** |
| TNF-α (pg/ml) | 27.39 (17.60-48.62) | 26.59 (17.78-30.82) | -42.9 | 0.24 |
| **Table 3.** Percentage difference of cardiovascular and inflammatory parameters of hospitalized COVID-19 patients on admission vs follow up. Mean ± SD; median (IQR)). Statistical significance *P* ≤0.05. BP, blood pressure; HbA1c, glycated haemoglobin. | | | | |

| **Variables** | COVID-19 | Diabetic controls | Healthy controls | p-value |
| --- | --- | --- | --- | --- |
| n = 84 | n = 42 | n = 43 |  |
| **Distribution of lipoprotein (a) by ethnicity (mg/d/L)** |  | | | |
| Black and Mixed race | 46.4 (19.8-66.3) | 50.1 (30.4-67.9) | 47.9 (28.9-51.9) | **0.25** |
| Asian and Indian | 17.4 (15.7-69.9) | 27.1 (9.4-56.3) | 12.6 (8.5-29.4) | **0.27** |
| White | 14.7 (8.5-50.1) | 9.7 (8.5-14.6) | 17.2 (8.5-28.9) | **0.58** |
| **Table 4.** Distribution of lipoprotein (a) by ethnicity in hospitalized COVID-19 patients on admission as compared to diabetic controls (DC) and healthy controls (HC). Data presented as mean ± SD; median (IQR). Statistical significance *P* ≤0.05. *p< 0.05 vs HC, †p <0.05 vs. DC. | | | | |
|  | | | | |

| **Lipid Profile** | **NLR** † | **CRP** | **Ferritin** | **Albumin** | **LDH** | **IL-6** | **IL-2** | **IFN-γ** | **TNF-α** | **IL10** |
| --- | --- | --- | --- | --- | --- | --- | --- | --- | --- | --- |
| Delta TC | -0.11  (-0.39, 0.19) | -0.13  (-0.41, 0.17) | -0.21  (-0.47, 0.09) | 0.34  (0.01, 0.60) | -0.21  (-0.48, 0.09) | -0.23  (-0.50, 0.08) | -0.28  (-0.54, 0.03) | -0.34  (-0.59, -0.03) | -0.19  (-0.47, 0.12) | 0.12  (-0.019 0.41) |
| p = 0.49 | p = 0.39 | p= 0.17 | **p= 0.04** | p= 0.16 | p=0.14 | p = 0.07 | **p= 0.02** | p = 0.22 | p = 0.46 |
| Delta LDL-C | -0.35  (-0.58,-0.06) | -0.23  (-0.49, 0.08) | -0.35  (-0.59, -0.06) | 0.48  (0.18, 0.69) | -0.29  (-0.54, 0.01) | -0.42  (0.65, -0.13) | -0.47  (-0.68, -0.18) | -0.29  (-0.56, 0.09 | -0.18  (-0.46, 0.14) | 0.08  (-0.23, 0.38) |
| **p = 0.01** | p = 0.14 | **p= 0.02** | **p= 0.002** | **p= 0.05** | **p= 0.005** | **p = 0.001** | **p = 0.05** | p = 0.27 | p = 0.62 |
| Delta HDL-C | 0.55  (0.29, 0.73) | 0.28  (-0.03, 0.53) | 0.43  (0.15, 0.64) | 0.01  (-0.32, 0.34) | -0.12  (-0.41, 0.18) | 0.68  (0.47, 0.82) | 0.58  (0.33,0.75) | -0.19  (-0.47, 0.13) | 0.02  (-0.29, 0.33) | 0.002  (-0.31, 0.31) |
| **p <0.0001** | p = 0.07 | **p= 0.03** | p= 0.93 | p= 0.42 | **p <0.001** | **p < 0001** | p= 0.23 | p = 0.89 | p = 0.98 |
| Delta TG† | 0.15  (-0.15, 0.43) | 0.19  (-0.12, 0.46) | 0.28  (-0.01, 0.54) | -0.21  (-0.51, 0.12) | -0.19  (-0.47, 0.10) | 0.15  (-0.16, 0.44) | 0.21  (-0.10, 0.49) | -0.18  (-0.46, 0.13) | -0.02  (-0.33, 0.28) | 0.18  (-0.14, 0.45) |
| p = 0.33 | p = 0.22 | p= 0.06 | p= 0.21 | p= 0.19 | p=0.33 | p = 0.18 | p=0.25 | p = 0.89 | p = 0.27 |
| Delta TG:HDL-C † | -0.16  (-0.44, 0.14) | 0.17  (-0.13, 0.45) | 0.04  (-0.26, 0.33) | -0.25  (-0.53, 0.09) | -0.10  (-0.39, 0.20) | -0.14  (-0.43, 0.17) | 0.04  (-0.27, 0.34) | -0.05  (-0.36, 0.26) | -0.04  (-0.35, 0.27) | -0.03  (-0.28, 0.33) |
| p = 0.28 | p = 0.26 | p= 0.82 | p= 0.14 | p= 0.51 | p= 0.39 | p=0.81 | p = 0.74 | p= 0.78 | p = 0.86 |
| Delta Lp(a) † | -0.15  (-0.43, 015) | 0.21  (-0.09, 0.48) | -0.19  (-0.46, 0.11) | 0.03  (-0.30, 0.35) | -0.13  (-0.41, 0.17) | -0.12  (-0.41, 0.19) | -0.12  (-0.41, 0.19) | -0.19  (-0.47, 0.12) | 0.13  (-0.18, 0.42) | -0.01  (-0.32,-0.29) |
| p = 0.32 | p = 0.17 | p= 0.21 | p= 0.86 | p= 0.39 | p= 0.46 | p = 0.45 | p=0.23 | p = 0.40 | p = 0.95 |
| **Table 5.** Correlations of delta lipid profiles with inflammatory markers from admission to follow up, adjusted for age, sex and race. †Logarithmically transformed, Statistical significance P≤0.05. CRP, c-reactive protein; eGFR, estimated glomerular filtration rate; HDL-C, high density lipoprotein cholesterol; IL-6, interleukin-6; IL-2, interleukin-2; IL-10, interleukin 10; LDH, lactate dehydrogenase; LDL-C, low density lipoprotein cholesterol; Lp(a), lipoprotein(a); NLR, neutrophil: lymphocyte ratio; PCT, procalcitonin; TC, total cholesterol; TG, triglyceride; TG:HDL, triglyceride: high density lipoprotein cholesterol ratio; TNF-α, tumour necrosis factor alpha. | | | | | | | | | | |
